# Supplementary material
Source: HighWire-hosted journal article supplement (https://jech.bmj.com/content/jech-2022-219011)
Supplement: inline-supplementary-material-1 [file inline-supplementary-material-1.pdf]

**Supplementary information.**

Comparison of estimates using imputed SAH estimates for older age groups:

Figure A (males)

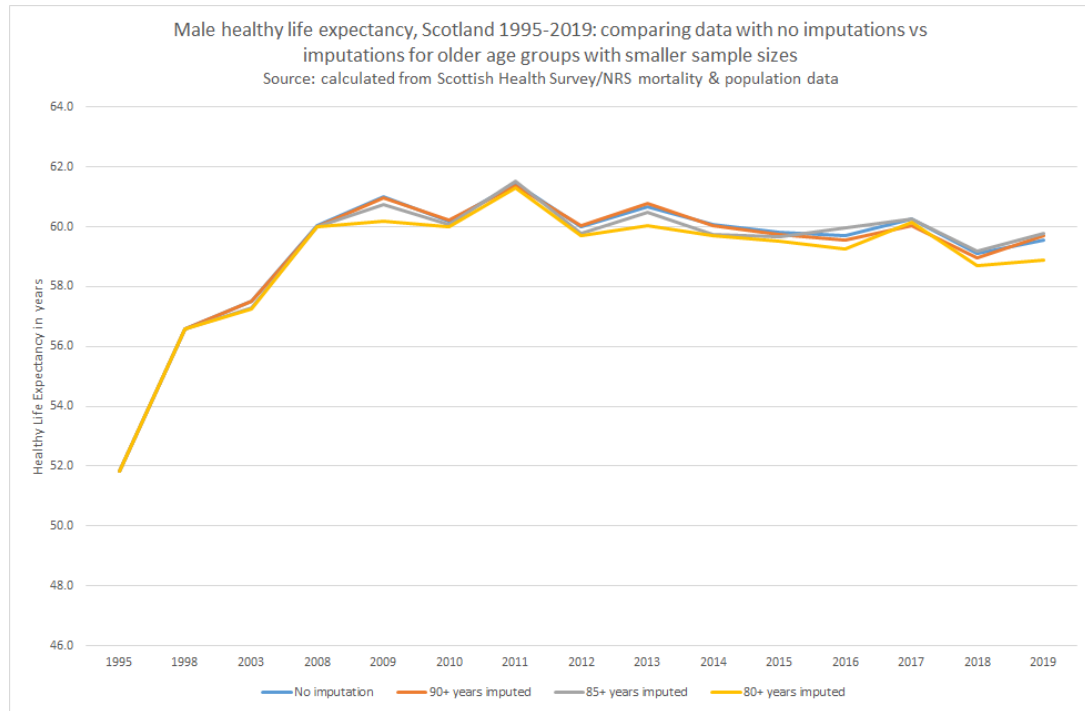

Figure B (females)

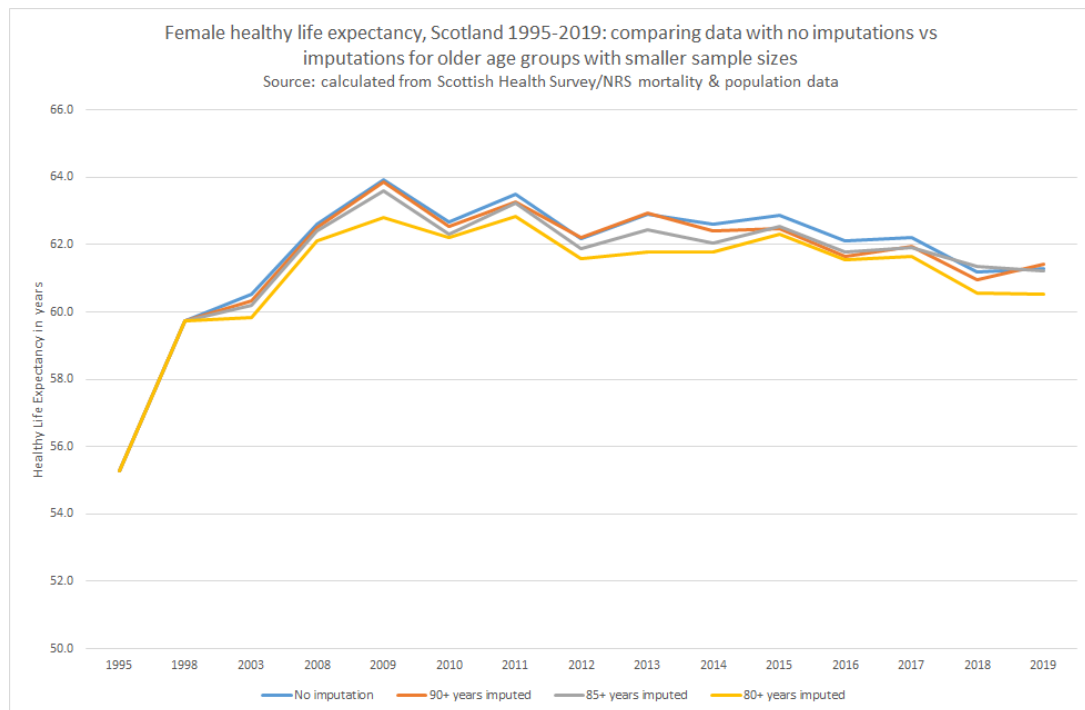

Supplementary table 1: survey sample size by year.

| <b>Survey year</b> | <b>Male</b> | <b>Female</b> | <b>Total</b> | <b>Deprivation quintile 1 (most deprived)</b> | <b>Deprivation quintile 5 (least deprived)</b> |
|--------------------|-------------|---------------|--------------|-----------------------------------------------|------------------------------------------------|
| <b>1995</b>        | 3524        | 4408          | 7932         |                                               |                                                |
| <b>1998</b>        | 5928        | 7011          | 12939        |                                               |                                                |
| <b>2003</b>        | 5262        | 6204          | 11466        | 2094                                          | 2245                                           |
| <b>2008</b>        | 3712        | 4500          | 8212         | 1499                                          | 1454                                           |
| <b>2009</b>        | 4618        | 5513          | 10131        | 1939                                          | 1974                                           |
| <b>2010</b>        | 4072        | 4960          | 9032         | 2033                                          | 1533                                           |
| <b>2011</b>        | 4278        | 5250          | 9528         | 1871                                          | 1678                                           |
| <b>2012</b>        | 3005        | 3594          | 6599         | 1083                                          | 1397                                           |
| <b>2013</b>        | 3086        | 3644          | 6730         | 1190                                          | 1189                                           |
| <b>2014</b>        | 2910        | 3415          | 6325         | 1132                                          | 1182                                           |
| <b>2015</b>        | 2979        | 3434          | 6413         | 1166                                          | 1107                                           |
| <b>2016</b>        | 2665        | 3218          | 5883         | 1037                                          | 1270                                           |
| <b>2017</b>        | 2416        | 2883          | 5299         | 897                                           | 1025                                           |
| <b>2018</b>        | 3129        | 3660          | 6789         | 1195                                          | 1363                                           |
| <b>2019</b>        | 3162        | 3717          | 6879         | 1186                                          | 1499                                           |
